# Supplementary material for: Binding site-driven sensing properties of a quinazoline derivative with metal cations
Source: Royal Society of Chemistry journal article supplement (doi:10.1039/c5ra04841a), 2015-01-01
Supplement: c5ra04841a1.pdf [file c5ra04841a1.pdf]

## Supporting Information

### Binding sites-driving sensing properties of a quinazoline derivative with metal cations

Yang Liu, Dan Wang, Xiang-Jun Zheng\*, Lin-Pei Jin

*Beijing Key Laboratory of Energy Conversion and Storage Materials, College of Chemistry, Beijing Normal University, Beijing, 100875, People's Republic of China*

*\*Corresponding author email: xjzheng@bnu.edu.cn*

**Table S1** Selected Bond Distances (Å) and Angles (deg) for **1** and **2**.

| <b>1</b>        |            |                 |           |                 |           |
|-----------------|------------|-----------------|-----------|-----------------|-----------|
| Cd(1)-O(1)      | 2.586(9)   | Cd(1)-O(2)      | 2.217(8)  | Cd(1)-O(3)      | 2.594(6)  |
| Cd(1)-O(4)      | 2.295(9)   | Cd(1)-N(3)      | 2.295(9)  | Cd(1)-N(5)      | 2.333(7)  |
| O(1)-Cd(1)-O(2) | 53.3(3)    | O(1)-Cd(1)-O(3) | 82.26(11) | O(1)-Cd(1)-O(4) | 97.9(3)   |
| O(1)-Cd(1)-N(3) | 94.7(3)    | O(1)-Cd(1)-N(5) | 158.8(3)  | O(2)-Cd(1)-O(3) | 96.6(3)   |
| O(2)-Cd(1)-O(4) | 143.67(12) | O(2)-Cd(1)-N(3) | 98.9(3)   | O(2)-Cd(1)-N(5) | 106.0(3)  |
| O(3)-Cd(1)-O(4) | 53.6(3)    | O(3)-Cd(1)-N(3) | 158.1(3)  | O(3)-Cd(1)-N(5) | 97.0(3)   |
| O(4)-Cd(1)-N(3) | 105.9(3)   | O(4)-Cd(1)-N(5) | 98.6(3)   | N(3)-Cd(1)-N(5) | 93.50(11) |

  

| <b>2</b>          |           |                  |           |                  |          |
|-------------------|-----------|------------------|-----------|------------------|----------|
| Cd(1)-N(2)        | 2.329(16) | Cd(1)-N(4)       | 2.199(14) | Cd(1)-Cl(2)      | 2.430(5) |
| Cd(1)-Cl(3)       | 2.421(6)  | N(2)-Cd(1)-Cl(2) | 106.6(4)  | N(2)-Cd(1)-Cl(3) | 118.8(4) |
| N(2)-Cd(1)-N(4)   | 96.5(2)   | N(4)-Cd(1)-Cl(2) | 119.0(4)  | N(4)-Cd(1)-Cl(3) | 108.3(4) |
| Cl(3)-Cd(1)-Cl(2) | 107.93(8) |                  |           |                  |          |

**Table S2** Comparison of the chemosensors for Al<sup>3+</sup>, Cr<sup>3+</sup> and Fe<sup>3+</sup> ions

| Chemosensor                                                 | Detected cation                                        | Detection limit                      | Differentiation of one from another | Reference |
|-------------------------------------------------------------|--------------------------------------------------------|--------------------------------------|-------------------------------------|-----------|
| Chromo-fluorogenic probe                                    | Al <sup>3+</sup> , Cr <sup>3+</sup> , Fe <sup>3+</sup> | 10 <sup>-8</sup> M                   | √                                   | 8a        |
| Pyridinyl-functionalized tetraphenylethene                  | Al <sup>3+</sup> , Cr <sup>3+</sup> , Fe <sup>3+</sup> | 10 <sup>-6</sup> M                   |                                     | 8b        |
| Spirobenzopyran-quinoline dyad                              | Al <sup>3+</sup> , Cr <sup>3+</sup> , Fe <sup>3+</sup> | 10 <sup>-6</sup> M                   | √                                   | 8c        |
| ESIPT based sensor                                          | Al <sup>3+</sup> , Cr <sup>3+</sup> , Fe <sup>3+</sup> | 10 <sup>-6</sup> M                   |                                     | 8d        |
| Chemodosimetric probe                                       | Al <sup>3+</sup> , Cr <sup>3+</sup> , Fe <sup>3+</sup> | 10 <sup>-8</sup> M                   |                                     | 8g        |
| RhB-based probe                                             | Al <sup>3+</sup> , Cr <sup>3+</sup> , Fe <sup>3+</sup> | 10 <sup>-5</sup> -10 <sup>-7</sup> M |                                     | 8e        |
| Rhodamine-naphthalimide dyad                                | Al <sup>3+</sup> , Cr <sup>3+</sup> , Fe <sup>3+</sup> | 10 <sup>-5</sup> M                   |                                     | 8f        |
| 6-furan-2-yl-5,6-dihydrobenzo(4,5)imidazo[1,2-c]quinazoline | Al <sup>3+</sup> , Cr <sup>3+</sup> , Fe <sup>3+</sup> | 10 <sup>-6</sup> M                   | √                                   | Our paper |

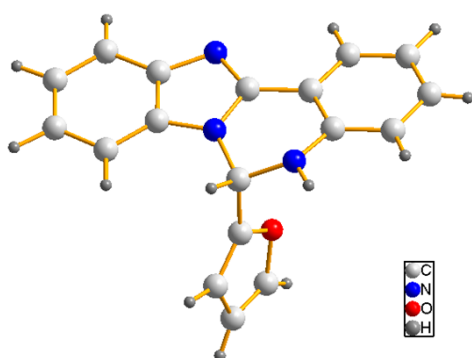

**Figure S1** Crystal structure of L.

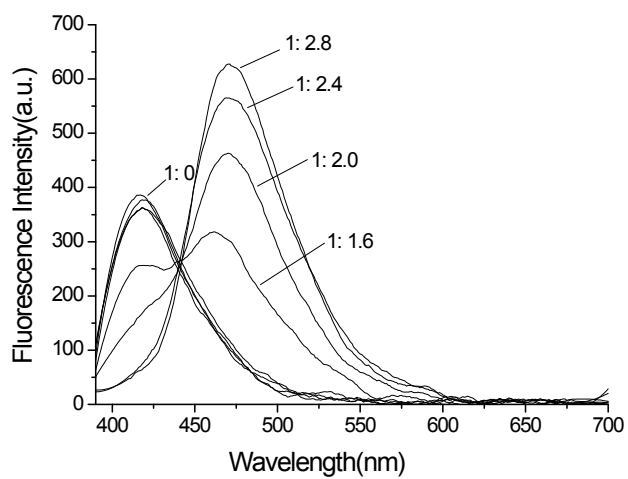

**Figure S2** Fluorescence properties of L (100  $\mu$ M) in  $\text{CH}_3\text{OH}$  with HCl (0, 0.4, 0.8, 1.2, 1.6, 2.0, 2.4, 2.8 equiv. )

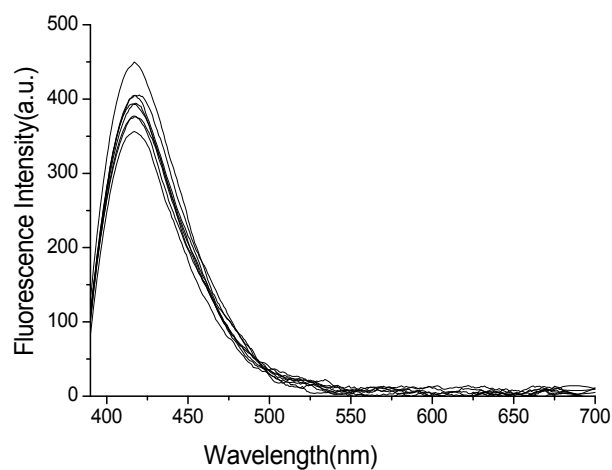

**Figure S3** Fluorescence properties of L (100  $\mu$ M) in  $\text{CH}_3\text{OH}$  with NaOH (0, 0.4, 0.8, 1.2, 1.6, 2.0, 2.4, 2.8 equiv. )

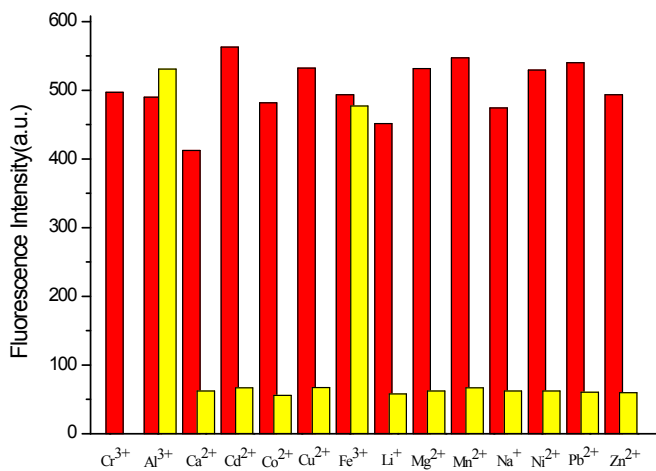

(a)

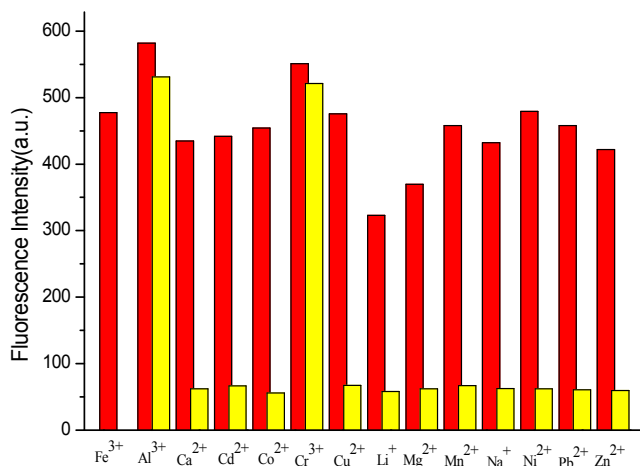

(b)

**Figure S4** (a) Fluorescence intensity of complexes of L and  $\text{Cr}^{3+}$  in the presence of various metal ions in  $\text{CH}_3\text{OH}$ .  $\lambda_{\text{ex}}=390$  nm and  $\lambda_{\text{em}}=471$  nm. Red bars: L( $30\mu\text{M}$ ) with 1.0 equiv. of  $\text{Cr}^{3+}$  and 1.0 equiv. of other metal ions stated. Yellow bars: L( $30\mu\text{M}$ ) with 1.0 equiv. of other metal ions stated; (b) Fluorescence intensity of complexes of L and  $\text{Fe}^{3+}$  in the presence of various metal ions in  $\text{CH}_3\text{OH}$ .  $\lambda_{\text{ex}}=388$  nm and  $\lambda_{\text{em}}=470$  nm. Red bars: L( $30\mu\text{M}$ ) with 1.0 equiv. of  $\text{Fe}^{3+}$  and 1.0 equiv. of other metal ions stated. Yellow bars: L( $30\mu\text{M}$ ) with 1.0 equiv. of other metal ions stated.

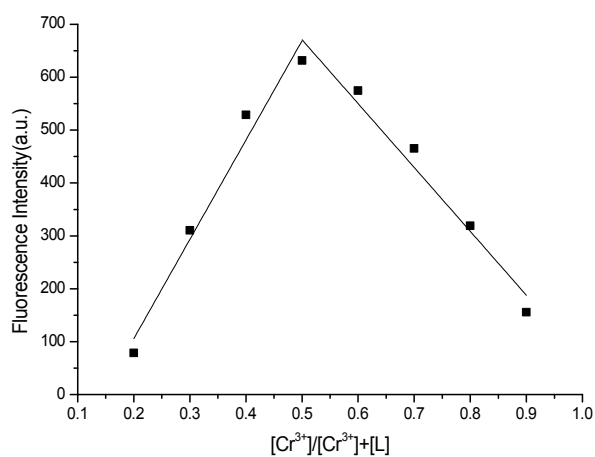

(a)

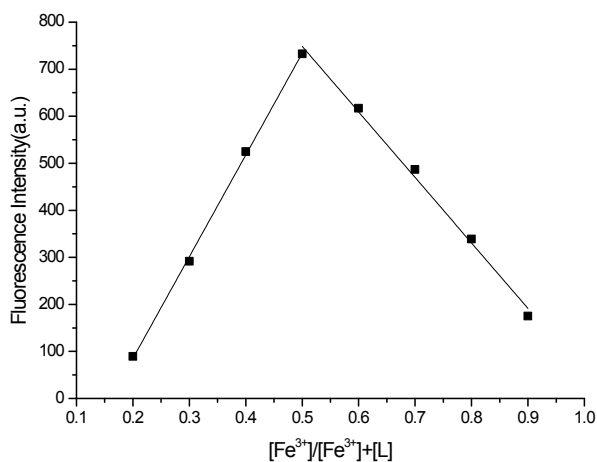

(b)

**Figure S5** (a) Job's plot for the determination of the stoichiometry of L and  $\text{Cr}^{3+}$  in the complexation; (b) Job's plot for the determination of the stoichiometry of L and  $\text{Fe}^{3+}$  in the complexation.

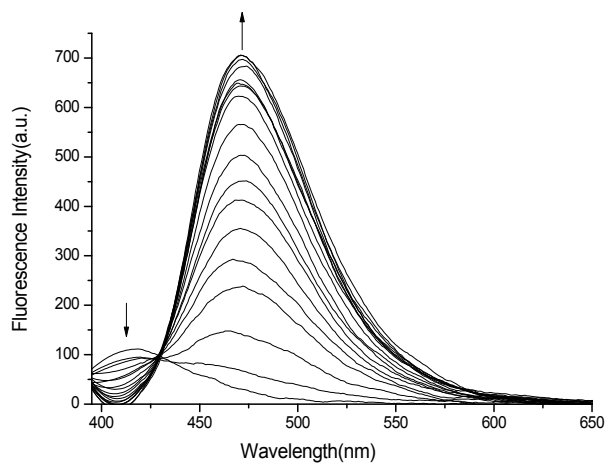

(a)

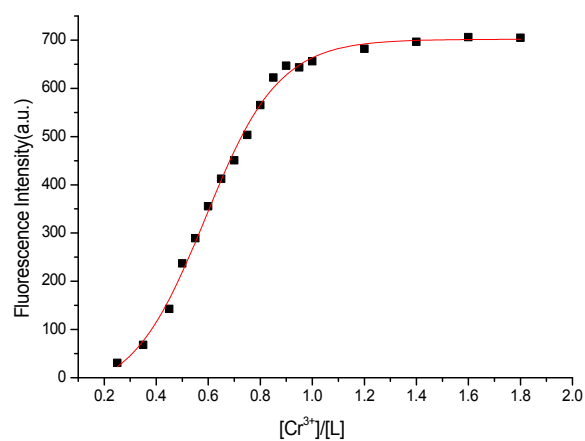

(b)

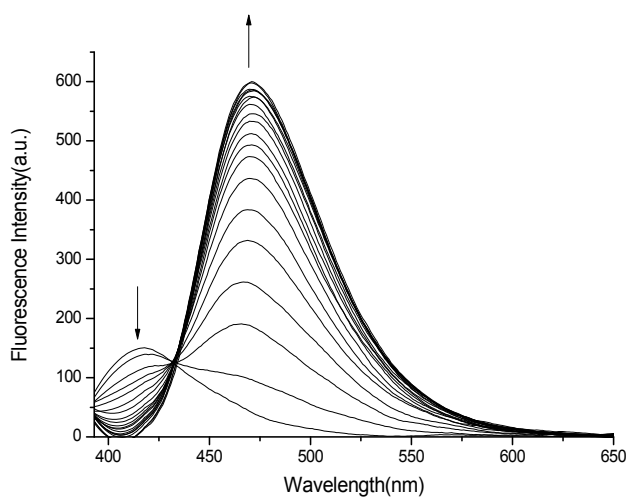

(c)

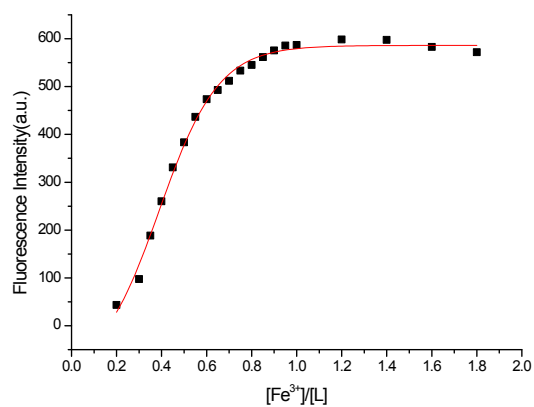

(d)

**Figure S6** (a) Fluorescence emission spectra( $\lambda_{\text{ex}}=390\text{nm}$ ) of L( $40\mu\text{M}$ ) in the presence of increasing amounts of  $\text{Cr}^{3+}$  (0.25, 0.35, 0.45, 0.50...0.80, 0.85, 0.90, 0.95, 1.00, 1.20, 1.40, 1.60, 1.80 equiv.) in  $\text{CH}_3\text{OH}$ ; (b) Spectrofluorimetric titration curve at  $\lambda_{\text{em}}=471\text{nm}$ ; (c) Fluorescence emission spectra( $\lambda_{\text{ex}}=388\text{nm}$ ) of L( $40\mu\text{M}$ ) in the presence of increasing amounts of  $\text{Fe}^{3+}$  (0.20, 0.30, 0.35, 0.45, 0.50...0.80, 0.85, 0.90, 0.95, 1.00, 1.20, 1.40, 1.60, 1.80 equiv.) in  $\text{CH}_3\text{OH}$ ; (d) Spectrofluorimetric titration curve at  $\lambda_{\text{em}}=471\text{nm}$ .

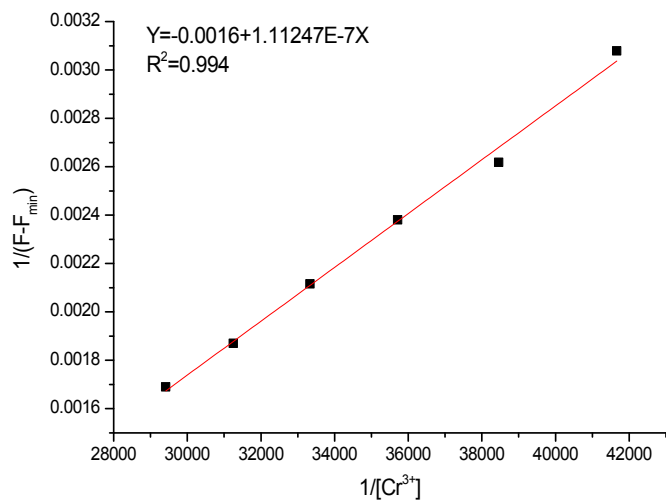

(a)

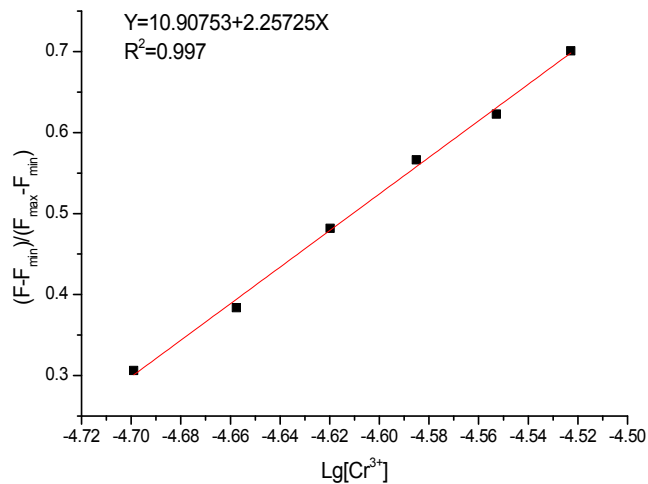

(b)

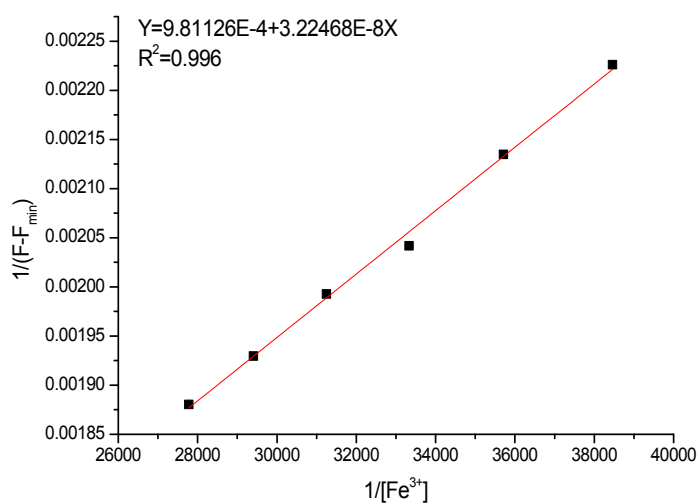

(c)

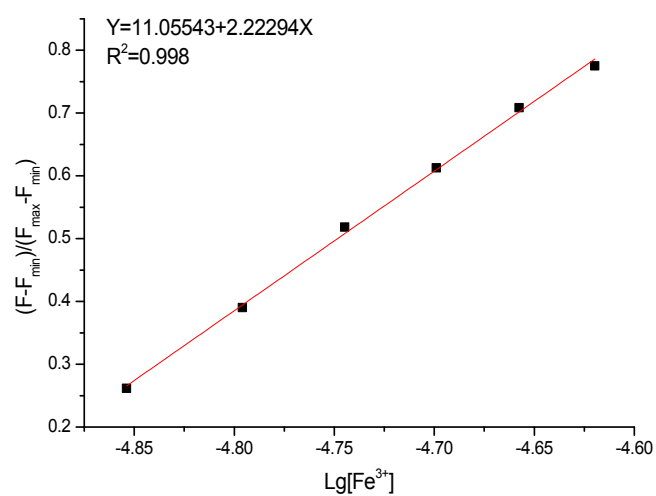

(d)

**Figure S7** (a) Benesi-Hildebrand plot of L with Cr<sup>3+</sup> in CH<sub>3</sub>OH ( $\lambda_{em}$  = 471 nm); (b) Normalized response of emission signal changing Cr<sup>3+</sup> concentrations at 471 nm; (c) Benesi-Hildebrand plot of L with Fe<sup>3+</sup> in CH<sub>3</sub>OH ( $\lambda_{em}$  = 470 nm); (d) Normalized response of emission signal changing Fe<sup>3+</sup> concentrations at 470 nm.

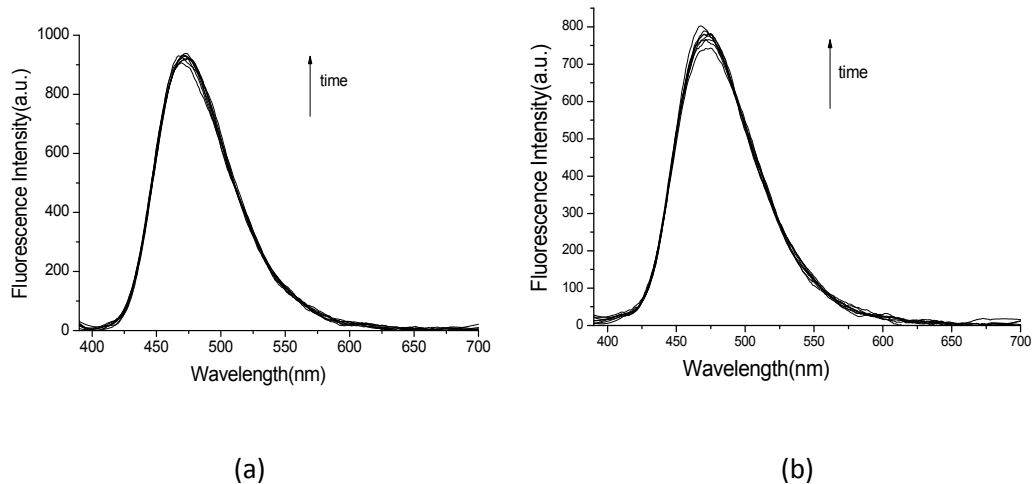

**Figure S8** Fluorescence spectra variation of L (67  $\mu\text{M}$ ) upon addition of 1.0 equiv. of  $\text{Al}^{3+}$  (a) and  $\text{Fe}^{3+}$  (b) in  $\text{CH}_3\text{OH}$  after 1, 2, 3, 4, 5, 10, 15, and 20 min,  $\lambda_{\text{ex}}=383$  nm.

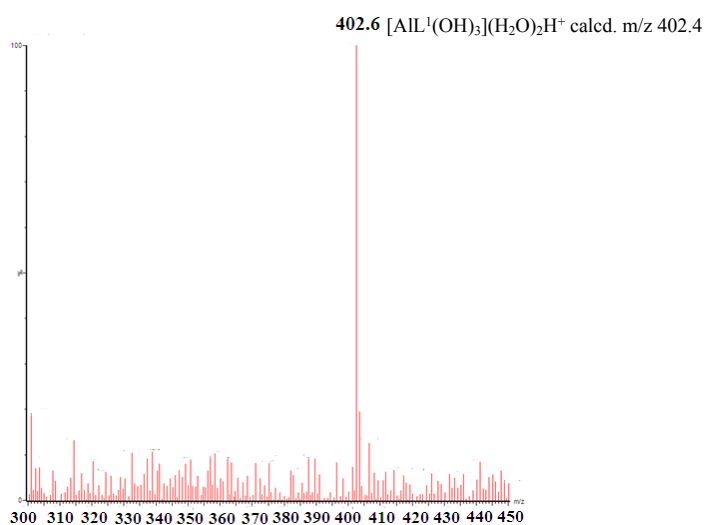

**Figure S9** ESI-MS of  $\text{L-Al}^{3+}(1:1)$  in  $\text{CH}_3\text{OH}/\text{H}_2\text{O}$  (1:9).

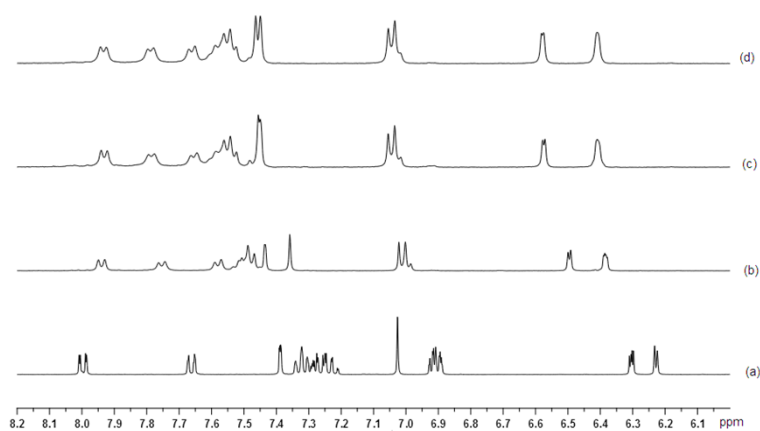

**Figure S10**  $^1\text{H}$  NMR spectra in  $\text{CH}_3\text{OH-d}_6$ : (a) L only; (b) L and 0.5 equiv. of  $\text{Cr}^{3+}$ ; (c) L and 1.0 equiv. of  $\text{Cr}^{3+}$ ; (d) L and 1.5 equiv. of  $\text{Cr}^{3+}$ .

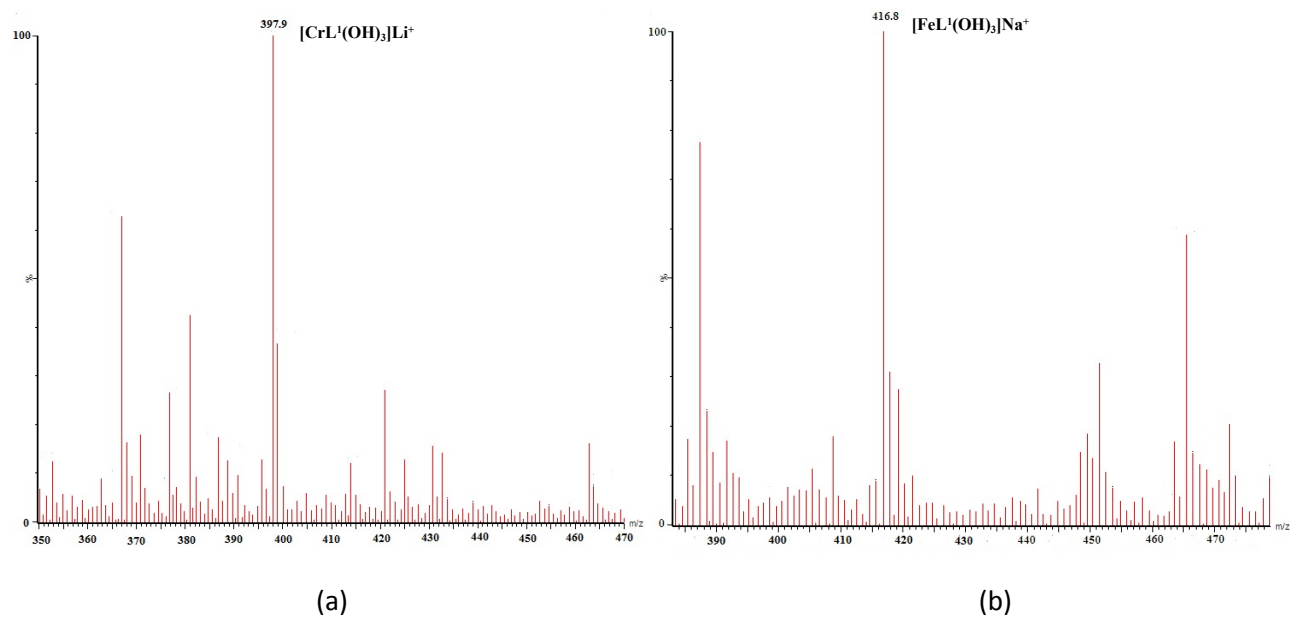

**Figure S11** (a) Positive-ion electrospray ionization mass spectra of L upon addition of 1.0 equiv.  $\text{Cr}^{3+}$  in  $\text{CH}_3\text{OH}$ ; (b) Positive-ion electrospray ionization mass spectra of L upon addition of 1.0 equiv.  $\text{Fe}^{3+}$  in  $\text{CH}_3\text{OH}$ .

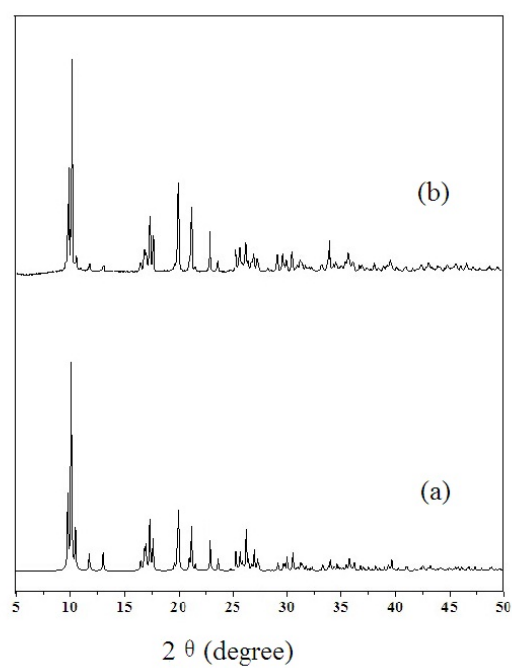

**Figure S12** (a) Simulated Powder X-ray diffraction for  $[\text{CdL}_2(\text{OAc})_2]$ ; (b) Powder X-ray diffraction for sample **1'**.



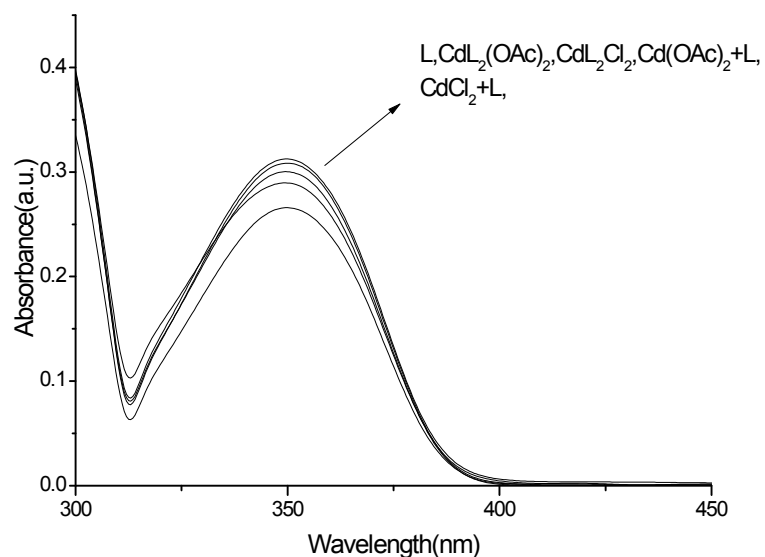

**Figure S13** UV-Vis absorptionspectra of CdL<sub>2</sub>(OAc)<sub>2</sub>(15 μM), CdL<sub>2</sub>Cl<sub>2</sub>(15 μM), L(30 μM) and L(30 μM) with 1.0 equiv. of CdCl<sub>2</sub>, Cd(OAc)<sub>2</sub> in CH<sub>3</sub>OH, respectively.

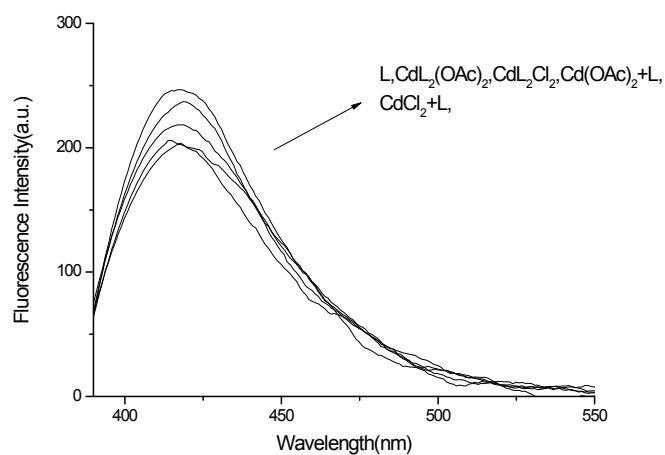

**Figure S14** Fluorescence spectra of CdL<sub>2</sub>(OAc)<sub>2</sub>(15 μM), CdL<sub>2</sub>Cl<sub>2</sub>(15 μM), L(30 μM) , and L(30 μM) with 1.0 equiv. of CdCl<sub>2</sub>, Cd(OAc)<sub>2</sub> in CH<sub>3</sub>OH, respectively.

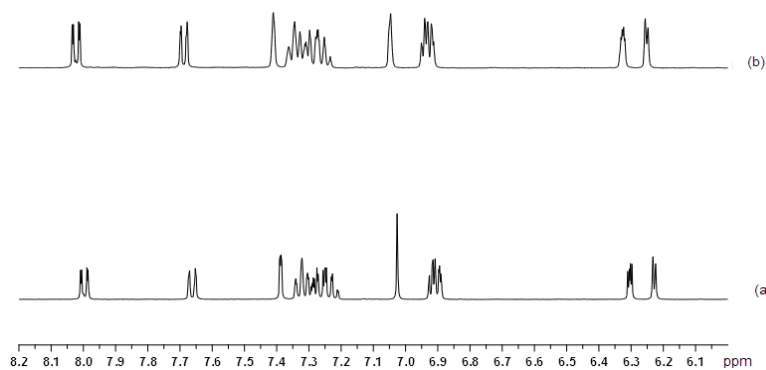

**Figure S15** <sup>1</sup>H NMR spectra in CH<sub>3</sub>OH-d<sub>6</sub>: (a) L; (b) CdL<sub>2</sub>(OAc)<sub>2</sub>.
